# Supplementary material for: Novel Barite Chimneys at the Loki's Castle Vent Field Shed Light on Key Factors Shaping Microbial Communities and Functions in Hydrothermal Systems
Source: PubMed Central journal article supplement (PMC4703759; doi:10.3389/fmicb.2015.01510), 2016-01-07

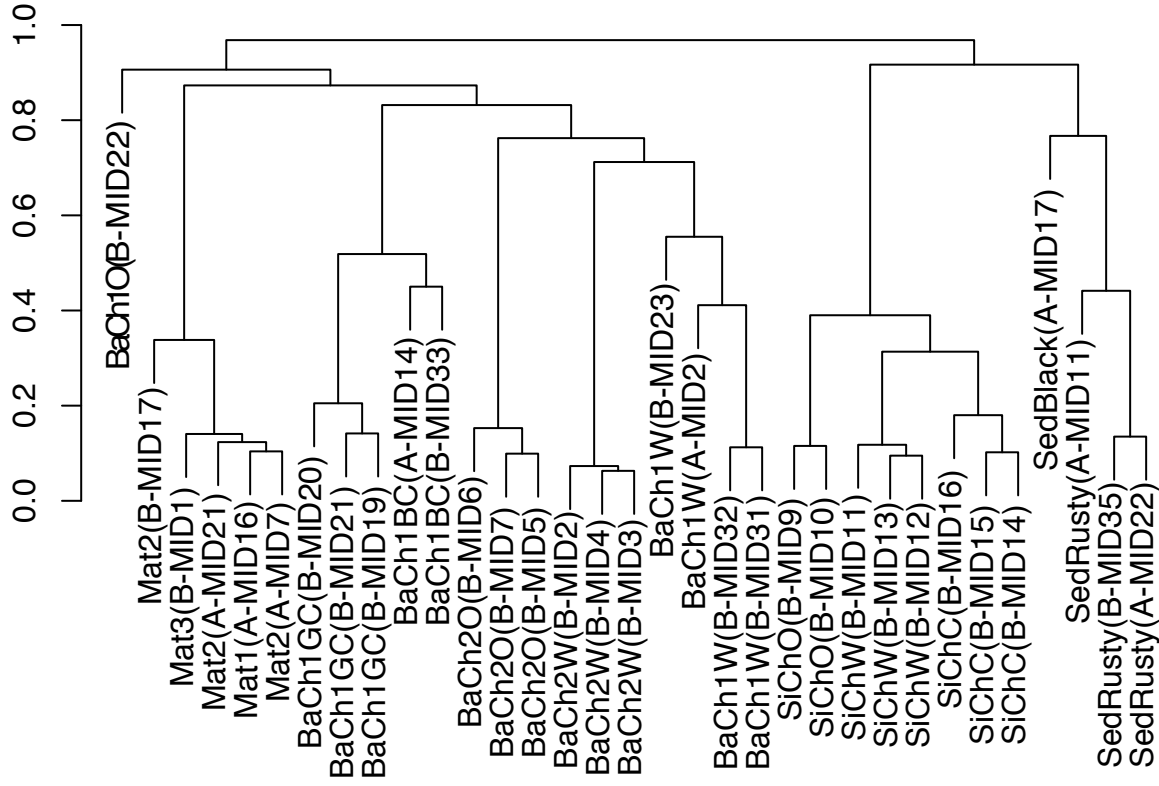

Supplement: Image3.pdf [file Image3.pdf]
